# Supplementary material for: Multidimensional Mutational Profiling of the Indian HNSCC Sub-Population Provides IRAK1, a Novel Driver Gene and Potential Druggable Target
Source: Front Oncol. 2021 Nov 2;11:723162. doi: 10.3389/fonc.2021.723162 (PMC8593415; doi:10.3389/fonc.2021.723162)
Supplement: Supplementary file 2 [file Table_1.xlsx]

## Sheet: Sheet1
Supplementary Table 1: Sample wise details of the number of reads and the total number of variants obtained after removal of 1000 genome variants.
No.of Reads (in Millions)				No of Variants
SampleID	R1	R2	Total	Total
sample14	45.6	45.6	91	36565
sample15	36.6	36.6	73	27932
sample15R	29.9	29.9	60	25529
sample16	33.9	33.9	68	26489
sample17	30.6	30.6	61	25602
sample18	34.3	34.3	69	29403
sample19	30.2	30.2	60	27016
sample20	28	28	56	33556
sample21	50.2	50.2	100	34463
sample25	34.5	34.5	69	30755
sample26	26.4	26.4	53	24990
sample27	24.4	24.4	49	21288
sample34	29	29	58	18029
sample40	38.9	38.9	78	26260
sample43	38.8	38.8	78	31528
sample44	26.9	26.9	54	24379
sample45	27.3	27.3	55	26728
sample46	39	39	78	29560
sample49	29.6	29.6	59	19541
sample50	40.7	40.7	81	31778
sample51	25.2	25.2	50	21843
sample53	36	36	72	15601
sample55	39.1	39.1	78	30877
sample56	23.9	23.9	48	20112
sample58	40.3	40.3	81	35610
sample59	36.1	36.1	72	31776
sample60	31.8	31.8	64	29625
sample65	35.7	35.7	71	22696
sample68	29.1	29.1	58	10352
sample70	45.8	45.8	92	29777
sample71	29.1	29.1	58	22736
sample72	33.5	33.5	67	23361
sample76	25.2	25.2	50	18739
sample77	44	44	88	27509
sample82	28.8	28.8	58	29106
sample83	35.6	35.6	71	30702
sample85	33.6	33.6	67	32002
sample88	29.9	29.9	60	28384
sample91	28.8	28.8	58	25833
